1 **Title Page**

2 *Title*

3 Neural Correlates of Impulsive Compulsive Behaviors in Parkinson’s Disease: A Japanese

4 Retrospective Study

5

6 *Authors*

7 Ikko Kimura<sup>a,b</sup>, Gajanan S. Revankar<sup>a</sup>, Kotaro Ogawa<sup>a</sup>, Kaoru Amano<sup>b,c</sup>, Yuta Kajiyama<sup>a,\*</sup>,

8 Hideki Mochizuki<sup>a,\*</sup>

9

10 *Affiliations*

11 <sup>a</sup>Department of Neurology, Osaka University Graduate School of Medicine, Suita 565-0871,

12 Japan

13 <sup>b</sup>Graduate School of Frontier Biosciences, Osaka University, Suita 565-0871, Japan

---

<sup>1</sup> Abbreviations: PD: Parkinson’s disease, ICB: impulsive compulsive behaviors, ICD: impulse control disorder, DDS: dopamine dysregulation syndrome, FC: functional connectivity, GMV: gray matter volume; NAcc: nucleus accumbens; J-QUIP: Japanese version of the Questionnaire for Impulsive Compulsive Disorders in Parkinson’s Disease, DRT: dopamine replacement therapy; DA: dopamine agonists; rsfMRI: resting-state functional magnetic resonance imaging; LEDD: levodopa equivalent daily dose; CSF: cerebrospinal fluid; WM: white matter; GM: gray matter; FWHM: full-width half maximum; FD: framewise displacement; TBV: total brain volume; vmPFC: ventromedial prefrontal cortex; MOG: middle occipital gyrus; STG: superior temporal gyrus; PCC: posterior cingulate cortex

1   <sup>c</sup> Graduate School of Information Science and Technology, The University of Tokyo, Tokyo

2   113-8656, Japan

3   \* These two authors equally contributed to this work.

4

5   ***Corresponding Authors:***

6   Yuta Kajiyama, M.D., Ph.D.

7   Email: [kajiyama@neuro.med.osaka-u.ac.jp](mailto:kajiyama@neuro.med.osaka-u.ac.jp)

8   Address: 2-2, Yamada-oka, Suita 565-0871, Japan

9   Tel: +81-6-6879-3571 Fax: +81-6-6879-3579

10

11   Hideki Mochizuki, M.D., Ph.D.

12   Email: [hmochizuki@neuro.med.osaka-u.ac.jp](mailto:hmochizuki@neuro.med.osaka-u.ac.jp)

13   Address: 2-2, Yamada-oka, Suita 565-0871, Japan

14   Tel: +81-6-6879-3571 Fax: +81-6-6879-3579

15

1 **Abstract**

2 Background: Impulsive compulsive behavior (ICB) often disturb patients with Parkinson's  
3 Disease (PD), of which impulse control disorder (ICD) and dopamine dysregulation  
4 syndrome (DDS) are two major subsets. Although the nucleus accumbens (NAcc) is involved  
5 in ICB, it remains unclear how the NAcc affects cortical function and defines the different  
6 behavioral characteristics of ICD and DDS.

7 Objectives: To identify the most involved cortico-striatal network in ICB and the differences  
8 in these networks between patients with ICD and those with DDS using structural and  
9 resting-state functional magnetic resonance imaging.

10 Methods: Patients with PD were recruited using the data from a previous cohort study and  
11 were divided into patients with ICB (ICB group) and those without ICB (non-ICB group)  
12 using the Japanese version of the Questionnaire for Impulsive Compulsive Disorders in  
13 Parkinson's Disease (J-QUIP). From these two groups, we extracted 37 pairs matched for age,  
14 sex, disease duration, and levodopa equivalent daily dose of dopamine agonists. Patients with  
15 ICB were further classified as either having ICD or DDS based on the J-QUIP subscore.  
16 General linear models were used to compare the gray matter volume and functional  
17 connectivity (FC) of the NAcc, caudate, and putamen between the ICB and non-ICB groups  
18 and between patients with ICD and those with DDS.

1 Results: We found no significant differences in gray matter volume between the ICB and  
2 non-ICB groups or between patients with ICD and those with DDS. Compared with the  
3 non-ICB group, the FC of the right NAcc in the ICB group was lower in the bilateral  
4 ventromedial prefrontal cortex and higher in the left middle occipital gyrus. Patients with  
5 DDS showed higher FC between the right putamen and left superior temporal gyrus and  
6 higher FC between the left caudate and bilateral middle occipital gyrus than patients with  
7 ICD. In contrast, patients with ICD exhibited higher FC between the left NAcc and the right  
8 posterior cingulate cortex than patients with DSS.

9 Conclusions: The functionally altered network between the right NAcc and ventromedial  
10 prefrontal cortex was associated with the presence of ICB in PD, and the surrounding  
11 cortico-striatal networks may differentiate between the behavioral characteristics of patients  
12 with ICD and those with DDS.

13

1 **Keywords**

2 Parkinson's Disease, Impulsive Compulsive Behaviors, Functional Connectivity, Voxel

3 Based Morphometry, Cortico-striatal Network

## 1        **1. Introduction**

2            Parkinson's disease (PD) is a neurodegenerative disease characterized by the  
3        deposition of alpha-synuclein and the degeneration of dopamine-producing cells in the  
4        substantia nigra (Rocha et al., 2018). Patients with PD present various motor and non-motor  
5        symptoms, including impulsive compulsive behavior (ICB). ICB is the state where patients  
6        are unable to resist a certain urge or impulse (Zhang et al., 2014), and 6–34.8% of patients  
7        with PD suffer from ICB during the treatment course of dopamine replacement therapy  
8        (DRT). While DRT improves motor symptoms, this therapy can exacerbate ICB and no  
9        established treatments were there for ICB (Weintraub and Claassen, 2017). Although  
10       symptoms associated with ICB worsen the quality of life of the patient and burden of  
11       caregivers (Voon et al., 2017; Weintraub and Nirenberg, 2013), ICB are commonly  
12       overlooked in clinical practice since patients hesitate to spontaneously report these behaviors  
13       owing to shame or denial of their symptoms (Evans et al., 2009; Perez-Lloret et al., 2012).  
14       Therefore, objective biomarkers, such as functional connectivity (FC) (Koike et al., 2021) or  
15       gray matter volume (GMV) (Kanai and Rees, 2011), are required to detect ICB before these  
16       symptoms interfere with patients' social lives.

17            The cause of ICB has been attributed to the non-physiological dopaminergic  
18       stimulation to the relatively intact regions within the degenerated cortico-striatal networks in  
19       PD, including nucleus accumbens (NAcc) (Vriend, 2018).

1 The deposition of alpha-synuclein in NAcc is lower in patients with ICB than in those  
2 without (Barbosa et al., 2019). Moreover, a recent meta-analysis of functional imaging  
3 studies revealed that hyperactivation of the NAcc was significantly associated with the  
4 presence of ICB (Santangelo et al., 2019). However, there remain no consistent results  
5 regarding which alterations in cortico-striatal interactions, including NAcc, lead to ICB.  
6 While previous studies revealed alterations in the FC in the fronto-striatal networks of the  
7 NAcc in patients with ICB (Mata-Marín et al., 2021; Navalpotro-Gomez et al., 2020;  
8 Tessitore et al., 2017), others have suggested the involvement of the FC in other subcortical  
9 regions, such as the caudate (Ruitenberget al., 2018) and putamen (Carriere et al., 2015;  
10 Ruitenberget al., 2018). Previous studies have also shown inconsistent results regarding  
11 which regions of the GMV are altered in patients with ICB (Santangelo et al., 2019). One  
12 major reason for these inconsistencies is attributed to the relatively small sample sizes in each  
13 study (Marek et al., 2022).

14 Another reason for the inconsistent results on the neural correlates of ICB across  
15 studies would be its heterogeneity (Weintraub and Claassen, 2017). ICB comprises two major  
16 subsets, namely impulse control disorder (ICD; intolerance of resisting an impulse to perform  
17 a certain behavior) and dopamine dysregulation syndrome (DDS; compulsive and excessive  
18 use of dopaminergic drugs) (Weintraub et al., 2015). Several case reports have shown that  
19 while dopamine agonists (DA) preferentially cause ICD, levodopa causes DDS (Ceravolo et

1 al., 2010; Evans et al., 2009). These reports suggest that different brain regions or  
2 mechanisms may be involved in the two symptoms. However, it remains unclear which  
3 regions are specifically involved in ICD or DDS development; hence identifying the region  
4 specific to each ICB subset is essential for the neuromodulation therapies (Evans et al.,  
5 2009).

6 Therefore, this study identifies the most relevant cortico-striatal networks in the  
7 occurrence of ICB and the differences in these networks between patients with ICD and those  
8 with DDS. For this purpose, we conducted a retrospective study to compare the FC of  
9 cortico-striatal networks or GMV between patients with and without ICB and between  
10 patients with ICD and those with DDS. We hypothesize that regions associated with the  
11 NAcc are functionally or structurally altered in patients with ICB.

12



1        **2. Material and methods**

2        *2.1 Participants*

3                This study was conducted as part of a prospective and exploratory study of  
4        disease-specific biomarkers and objective indicators of neurodegenerative diseases at Osaka  
5        University (UMIN ID: UMIN000036570), which registered all patients with PD admitted to  
6        Osaka University Hospital (Kajiyama et al., 2021; Nakano et al., 2021; Otomune et al., 2019).  
7        We obtained data on those with or without ICB. We enrolled patients who met the following  
8        inclusion criteria: (1) aged 40–85 years, (2) diagnosed with clinically established or probable  
9        PD according to the Movement Disorder Society Parkinson Disease Diagnostic Criteria  
10        (Postuma et al., 2015), (3) completed resting-state functional magnetic resonance imaging  
11        (rsfMRI) and structural MRI scans, and (4) completed the Japanese version of the  
12        Questionnaire for Impulsive-Compulsive Disorders in Parkinson’s Disease (J-QUIP). The  
13        exclusion criteria were as follows: (1) a history of other neurological or psychiatric diseases  
14        and (2) significant neurological abnormalities on MRI scans (e.g., brain tumor or cerebral  
15        infarction) evaluated by two neurologists (K.I. and K.Y.). Based on these criteria, 184  
16        patients were included in this study.

17

18

19

1    2.2 *Ethics*

2           This study was approved by the Osaka University clinical research review committee  
3    (Approval number: 13471-12) and was performed in accordance with the Declaration of  
4    Helsinki. Written informed consent was obtained from all participants.

5

6    2.3 *Evaluation for ICB*

7           We divided the eligible patients into two groups namely ICB and non-ICB groups.  
8    The ICB group was defined as having a score greater than zero in J-QUIP, whereas the  
9    non-ICB group had a score equal to zero (Takeshige-Amano et al., 2022; Tanaka et al., 2013).  
10   To investigate the characteristics of ICD and DDS, we further defined patients with ICD as  
11   those who responded yes to any item in the following sections of the J-QUIP: A (pathological  
12   gambling), B (hypersexuality), C (compulsive buying), and D (binge eating). In contrast, we  
13   defined patients with DDS as those who responded yes to any item in section F (DDS) of the  
14   J-QUIP.

15

16   2.4 *Clinical evaluations*

17           The following information was obtained from the registered data to acquire the basic  
18    characteristics of each group: age, sex, handedness, dominant side of motor symptoms,  
19    disease duration, medications, levodopa equivalent daily dose (LEDD), Apathy Scale,

1 Epworth Sleepiness Scale, Frontal Assessment Battery, Geriatric Depression Scale, Hamilton  
2 Depression Rating Scale, Mini-Mental State Examination, Parkinson’s Disease  
3 Questionnaire-39, and Movement Disorder Society-Sponsored Revision of the Unified  
4 Parkinson’s Disease Rating Scale. The LEDD was calculated according to a previous report  
5 (Tomlinson et al., 2010).

6

### 7 *2.5 Image acquisition*

8 MRI data were collected using a GE 3T scanner (GE Medical Systems, WI, USA) in a  
9 dark room at Osaka University Hospital. Standard foam pads were placed in the scanner to  
10 stabilize the patients’ heads. rsfMRI data were acquired with axial gradient-echo echo-planar  
11 imaging (voxel size =  $3.3 \times 3.3 \times 3.2$  mm, slice gap = 0.8 mm, matrix size =  $64 \times 64 \times 40$ ,  
12 TE = 30 ms, TR = 2.5 s, flip angle =  $80^\circ$ , 240 volumes). During rsfMRI scans, patients were  
13 required to keep their eyes fixated on a black cross located at the center of the screen and  
14 their bodies as steady as possible, without any thoughts in their minds. Structural MRI data  
15 were obtained with a T1-weighted sagittal inversion-recovery spoiled-gradient-echo sequence  
16 (voxel size =  $1.2 \times 1 \times 1$  mm, matrix size =  $200 \times 256 \times 256$ , TE = 3.2 ms, TR = 8.2 ms,  
17 inversion time = 400 ms). Both MRI scans were collected during the “on” state of each  
18 patient.

19

1

## 2 *2.6 Quality control for MRI scans*

3           To ensure the image quality of MRI scans, the data were excluded based on the  
4 following criteria: (1) significant motion was observed by visual inspection of structural MRI  
5 and rsfMRI data ( $n = 6$ ) and (2) excessive head motion was detected in rsfMRI scans defined  
6 as mean framewise displacement (FD)  $> 0.2$  mm, exceeded 20% prevalence of scans with FD  
7  $> 0.5$  mm, or maximum FD  $> 5$  mm (Parkes et al., 2018) ( $n = 28$ ). We excluded 34 patients,  
8 and the data of the remaining 150 patients were used for further analysis.

9

## 10 *2.7 Image analysis*

11           To conduct FC analysis, T1-weighted and rsfMRI data were preprocessed with the  
12 default pipeline of fMRIPrep 20.2.1 (Esteban et al., 2019). T1-weighted data were  
13 intensity-normalized, skull-stripped, and tissue-segmented into cerebrospinal fluid (CSF),  
14 white matter (WM), and gray matter (GM). These data were then spatially normalized to the  
15 Montreal Neurological Institute nonlinear 6th-generation space (MNI standard space). For  
16 rsfMRI data, we first skull-stripped the entire dataset, defining the first rsfMRI data as the  
17 reference for co-registration to the T1-weighted data. The fMRI data were then corrected for  
18 motion and slice timing, warped to the MNI standard space, spatially smoothed with a  
19 Gaussian kernel of 6 mm full-width half maximum (FWHM), and temporally band-pass

1 filtered between 0.001 and 0.01 Hz. Several nuisance signals were extracted from the  
2 preprocessed rsfMRI data (six head-motion parameters; global signals from the CSF, WM,  
3 and the whole brain; motion outliers). We defined the head-motion parameters from the  
4 estimates of the motion-correction step and the motion outliers as  $FD > 0.5$  mm or  
5 standardized DVARS (Power et al., 2014)  $> 1.5$  standard deviation (Parkes et al., 2018).  
6 DVARS was calculated according to a previous study (Power et al., 2014).

7 To investigate the FC of the NAcc and other striata, namely the caudate and putamen,  
8 seed-based correlation analysis was conducted with Nilearn 0.8.1  
9 (<https://nilearn.github.io/stable/index.html>). Six seeds (the right or left NAcc, putamen, and  
10 caudate) were used and defined using Harvard-Oxford cortical and subcortical structural  
11 atlases (Desikan et al., 2006). FC between each seed and each voxel in the whole brain was  
12 calculated using Fisher's z-transformed Pearson's correlation coefficient (z-value) while  
13 regressing out the nuisance signals described above.

14 To analyze GMV, T1-weighted data were preprocessed separately using Statistical  
15 Parametric Mapping 12 (SPM12) (Friston, 2003) on MATLAB R2020a (Mathworks, Natick,  
16 MA). The details of the preprocessing steps have been described in our previous study  
17 (Kajiyama et al., 2021). In brief, T1-weighted data were segmented into CSF, GM, and WM;  
18 spatially normalized to the MNI standard space; spatially smoothed with a Gaussian kernel of  
19 8 mm FWHM.

1

## 2 *2.8 Statistical analysis*

3 To compare the basic and neuroimaging characteristics between the ICB and non-ICB  
4 groups, we first extracted pairs from the two groups that were matched for age, sex, disease  
5 duration, and LEDD of the DA. Disease duration and DA dose were used for extracting the  
6 pairs because both are major risk factors of ICB (Evans et al., 2009) and affect other  
7 non-motor symptoms.

8 For the comparison of basic characteristics between the ICB and non-ICB groups,  
9 Mann–Whitney *U* tests were applied for continuous variables. For categorical variables,  
10 chi-squared tests were applied, and if the ratio of cells with an expected frequency < 5 was  
11 more than 20%, Fisher’s exact tests were applied (Kim, 2017). These tests were performed  
12 using R (version 4.1.2, <https://www.r-project.org/>), and  $P < 0.05$  was considered statistically  
13 significant.

14 A second-level general linear model analysis implemented in SPM12 was used to  
15 compare FC on each seed or GMV between the ICB and non-ICB groups and between  
16 patients with ICD and those with DDS. To compare the ICB and non-ICB groups, we  
17 performed two-tailed *t*-tests for FC and an analysis of covariance for GMV, defining total  
18 brain volume (TBV) as covariates of no interest. To compare patients with ICD and those  
19 with DDS, two separate binary variables (i.e., whether they had ICD/DDS) were first

1 regressed against FC or GMV within the ICB group, setting TBV as covariates of no interest  
2 in GMV. We then assessed the differences between the coefficients of ICD (ICD effect) and  
3 DDS (DDS effect) using a two-tailed t-test. A voxel-level uncorrected  $P < 0.001$  and a  
4 cluster-wise family-wise error-corrected  $P < 0.05$  were considered statistically significant.

5 To rule out the possibility of involvement of possible confounders in each of the  
6 significant clusters, we calculated Spearman's correlation coefficients between the mean  
7 z-value of each significant cluster and each continuous variable in the basic characteristics.  
8 We also performed Mann–Whitney  $U$  tests on the mean z-value of each significant cluster  
9 divided by each categorical variable for the basic characteristics.

10

### 11 *2.9 Data and code availability*

12 The data for the clinical evaluations and codes used for this analysis are available at  
13 github. The raw MRI data are not openly available due to privacy restrictions of clinical data  
14 but are available upon a reasonable request from the corresponding authors.

15

1        **3. Results**

2        *3.1 Basic characteristics*

3                From the 150 eligible patients, we extracted 37 pairs of ICB and non-ICB groups.

4        According to the J-QUIP, 22, 13, and 8 patients had ICD, DDS, and both, respectively.

5        Between the ICB and non-ICB groups, we found no significant differences in basic

6        characteristics (Table 1; see Supplementary Table 1 and Supplementary Table 2 for the basic

7        characteristics of 150 eligible patients and patients with ICD or DDS, respectively).

8  
9        **Table 1.** Basic characteristics of patients with Parkinson’s disease in the ICB and non-ICB  
10        group

| Characteristics                |               | ICB (n = 37)           | non-ICB (n = 37)      | <i>P</i>          |
|--------------------------------|---------------|------------------------|-----------------------|-------------------|
| Age (years)                    |               | 66.0 (11.6)            | 66.6 (11.3)           | 0.79              |
| Sex (male)                     |               | 17 (46%) <sup>†</sup>  | 18 (49%) <sup>†</sup> | 1.00 <sup>‡</sup> |
| Handedness (right)             |               | 37 (100%) <sup>†</sup> | 34 (92%) <sup>†</sup> | 0.24 <sup>*</sup> |
| Dominant side of motor symptom | right         | 20 (54%) <sup>†</sup>  | 12 (32%) <sup>†</sup> | 0.17 <sup>*</sup> |
|                                | left          | 14 (38%) <sup>†</sup>  | 20 (54%) <sup>†</sup> |                   |
|                                | no laterality | 3 (8.1%) <sup>†</sup>  | 5 (14%) <sup>†</sup>  |                   |
| Disease duration (years)       |               | 8.32 (8.1)             | 8.1 (7.0)             | 0.93              |
| Medications                    | pramipexole   | 7 (19%) <sup>†</sup>   | 10 (27%) <sup>†</sup> | 0.58 <sup>‡</sup> |



|              |                     |                       |                       |                   |
|--------------|---------------------|-----------------------|-----------------------|-------------------|
| (yes)        | ropinirole          | 6 (16%) <sup>†</sup>  | 1 (2.7%) <sup>†</sup> | 0.11 <sup>*</sup> |
|              | rotigotine          | 9 (24%) <sup>†</sup>  | 8 (22%) <sup>†</sup>  | 1.00 <sup>‡</sup> |
| LEDD (mg)    | total               | 533.5 (441.0)         | 606.6 (585.6)         | 0.86              |
|              | DA                  | 97.6 (124.2)          | 105.4 (139.8)         | 0.81              |
| Apathy Scale |                     | 16.2 (8.3)            | 15.9 (6.8)            | 0.76              |
| ESS          |                     | 9.2 (4.2)             | 8.3 (5.4)             | 0.23              |
| FAB          |                     | 11.3 (6.7)            | 14.2 (2.7)            | 0.69              |
| GDS          |                     | 6.0 (3.3)             | 5.3 (3.0)             | 0.34              |
| HAM-D        |                     | 5.6 (4.6)             | 6.7 (4.9)             | 0.27              |
| MMSE         |                     | 26.7 (3.9)            | 27.6 (3.8)            | 0.13              |
| PDQ-39       |                     | 47.2 (22.1)           | 46.5 (28.0)           | 0.62              |
| MDS-UPDRS    | part1               | 11.5 (5.8)            | 10.8 (6.7)            | 0.59              |
|              | part2               | 15.6 (8.2)            | 15.3 (10.4)           | 0.64              |
|              | part3               | 31.4 (14.0)           | 31.2 (17.9)           | 0.67              |
|              | part4               | 3.9 (4.2)             | 3.4 (4.5)             | 0.36              |
| J-QUIP       | Total score         | 2.1 (2.1)             | NaN                   | NaN               |
|              | A (score $\geq 1$ ) | 6 (16%) <sup>†</sup>  | NaN                   | NaN               |
|              | B (score $\geq 1$ ) | 3 (8.1%) <sup>†</sup> | NaN                   | NaN               |
|              | C (score $\geq 1$ ) | 6 (16%) <sup>†</sup>  | NaN                   | NaN               |

---

|                    |                       |     |     |
|--------------------|-----------------------|-----|-----|
| D (score $\geq$ 1) | 12 (32%) <sup>†</sup> | NaN | NaN |
| E (score $\geq$ 1) | 20 (54%) <sup>†</sup> | NaN | NaN |
| F (score $\geq$ 1) | 13 (35%) <sup>†</sup> | NaN | NaN |

---

- 1 Scores are presented as the mean (SD).<sup>†</sup>Scores are presented as frequency (percentage).<sup>‡</sup>
- 2 P-values were calculated using the chi-square test. \* P-values were calculated using Fisher's
- 3 exact test.
- 4 Abbreviations: ICB, impulsive compulsive behaviors; LEDD, levodopa equivalent daily
- 5 dose; DA, dopamine agonist; ESS, Epworth Sleepiness Scale; FAB, Frontal Assessment
- 6 Battery; GDS, Geriatric Depression Scale; HAM-D, Hamilton Depression Rating Scale;
- 7 MMSE, Mini Mental State Examination; PDQ-39, Parkinson's Disease Questionnaire-39
- 8 Summary Index; MDS-UPDRS, Movement Disorder Society-Sponsored Revision of the
- 9 Unified Parkinson's Disease Rating Scale; J-QUIP, Japanese version of the Questionnaire for
- 10 Impulsive Compulsive Disorders in Parkinson's Disease
- 11
- 12

1     3.2 Comparisons between the ICB and non-ICB groups

2             We first compared FC for six seeds (the right or left NAcc, putamen and caudate)  
3     between ICB and non-ICB groups. Comparisons concerning the FC of the right NAcc  
4     revealed that the FC of the ICB group was significantly lower in the bilateral ventromedial  
5     prefrontal cortex (vmPFC) than that of the non-ICB group (Figure 1A; see Supplementary  
6     Table 3 for statistical values and peak MNI-coordinates on each significant cluster). The  
7     mean z-values of this significant cluster were  $0.10 \pm 0.10$  and  $0.25 \pm 0.12$  in the ICB and  
8     non-ICB groups, respectively (Figure 1B). In contrast, the FC of the ICB group was  
9     significantly higher in the left middle occipital gyrus (MOG) than that of the non-ICB group  
10    (Figure 1A). The mean z-values of FC in this cluster were  $0.019 \pm 0.083$  and  $-0.090 \pm$   
11     $0.088$  in the ICB and non-ICB groups, respectively (Figure 1C). We observed no significant  
12    differences between the ICB and non-ICB groups regarding the FC in the left NAcc, bilateral  
13    caudate, or bilateral putamen and the GMV.

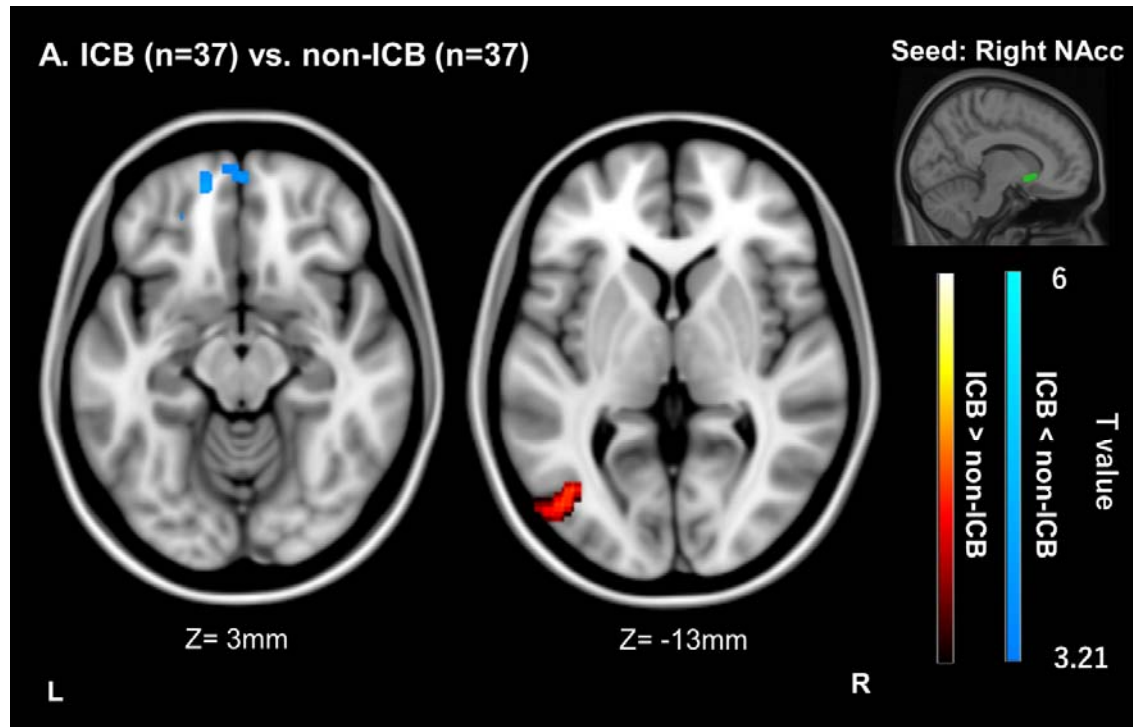

1

2 **Figure 1.** Seed-based correlation analysis comparing the functional connectivity between the  
3 ICB and non-ICB groups. (A) The resulting spatial maps. The green shaded region indicates  
4 the seed (right NAcc). The axial slices are displayed according to the neurological convention  
5 (left on the picture is left in the brain). (B, C) Boxplot of the mean Fisher-transformed  
6 Pearson's correlation coefficients (z-values) of each significant cluster in each group.

7 Abbreviations: ICB, impulsive compulsive behaviors; NAcc, nucleus accumbens; vmPFC,  
8 ventromedial prefrontal cortex; MOG, middle occipital gyrus

9

1    3.3 Comparisons between the ICD and DDS effects

2           We then compared FC and GMV between patients with ICD and those with DDS and  
3    found that the FC of patients with ICD was lower between the right putamen and left superior  
4    temporal gyrus (STG) and between the left caudate and bilateral MOG than that of patients  
5    with DDS (Figure 2A). The mean z-values on the FC between the right putamen and left STG  
6    were  $-0.041 \pm 0.18$ ,  $0.12 \pm 0.13$ , and  $0.019 \pm 0.12$  in patients with ICD, those with DDS,  
7    and the non-ICB group, respectively (Figure 2B). The mean z-values on the FC between the  
8    left caudate and bilateral MOG were  $-0.13 \pm 0.089$ ,  $0.0025 \pm 0.11$ , and  $-0.11 \pm 0.093$  in  
9    patients with ICD, those with DDS, and the non-ICB group, respectively (Figure 2C). In  
10   contrast, the FC between the left NAcc and right posterior cingulate cortex (PCC) in patients  
11   with ICD was lower than that in patients with DDS (Figure 2A). The mean z-values of the FC  
12   between the left NAcc and right PCC were  $0.055 \pm 0.12$ ,  $-0.082 \pm 0.10$ , and  $0.029 \pm$   
13    $0.098$  in patients with ICD, those with DDS, and the non-ICB group, respectively (Figure 2D).  
14   We found no significant differences between patients with ICD and those with DDS  
15   regarding the FC of the right caudate, right NAcc, or left putamen and the GMV.

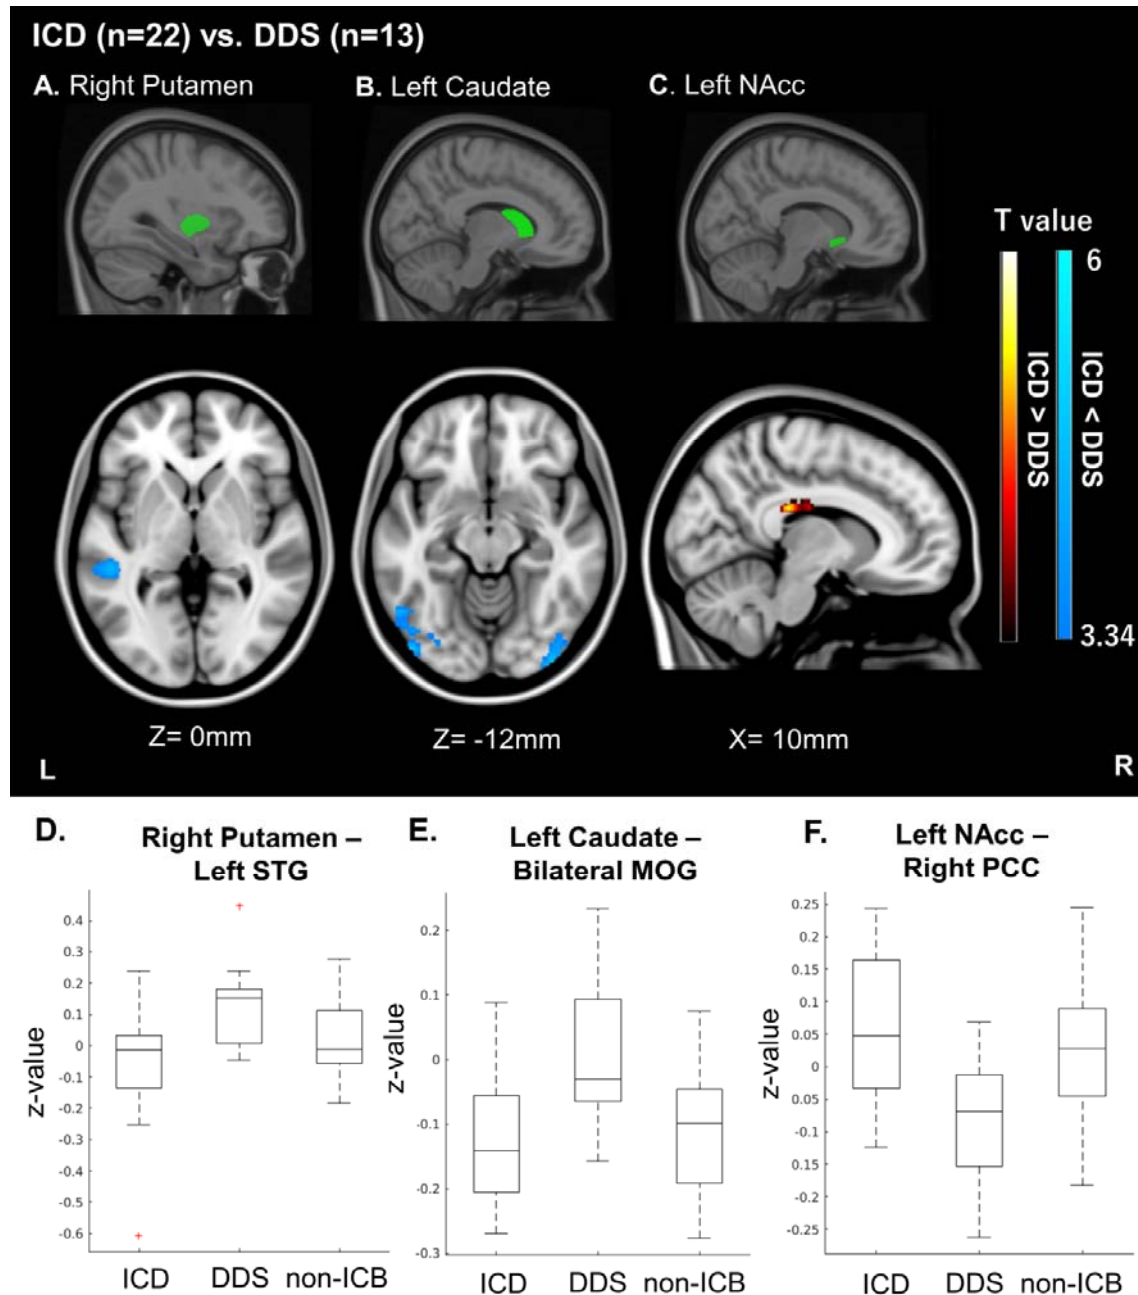

1  
2 **Figure 2.** Seed-based correlation analysis comparing the functional connectivity between the  
3 ICD and DDS effects in patients with PD. The resulting spatial maps using (A) right putamen,  
4 (B) left caudate, and (C) left NAcc as a seed. The green shaded regions indicate the seed. The  
5 axial slices are displayed according to the neurological convention (left on the picture is left  
6 in the brain). (D – F) Boxplots of the mean z-value of each significant cluster in patients with  
7 ICD, with DDS, and without ICB, respectively. A red-cross indicates an outlier detected by  
8 the default settings of “boxplot” in MATLAB.

1 Abbreviations: ICD, impulse control disorder; DDS, dopamine dysregulation syndrome; ICB,  
2 impulsive compulsive behaviors; PD, Parkinson's disease; STG, superior temporal gyrus;  
3 MOG, middle occipital gyrus; NAcc, nucleus accumbens; PCC, posterior cingulate cortex

4

5 *3.4 Dependencies with possible confounding factors*

6 We found no significant dependencies of the basic characteristics on the mean z-value  
7 of each significant cluster when comparing between the ICB and non-ICB groups  
8 (Supplementary Table 4) or between ICD and DDS effects (Supplementary Table 5).

9

10

## 1        **4. Discussion**

2            To the best of our knowledge, our study included the largest sample size compared  
3 with other related previous studies (Santangelo et al., 2019). Here, we found that the FC of  
4 the right NAcc differed between the ICB and non-ICB groups and that the FC of the left  
5 NAcc, left caudate, and right putamen were altered in patients with ICB and those with DDS.  
6 None of these significant clusters was dependent on any other clinical demographics,  
7 suggesting that these differences were specifically derived from differences in ICB  
8 characteristics.

### 9 10        *4.1 FC of the right NAcc was altered in the ICB group*

11            The FC between the right NAcc and bilateral vmPFC was lower in the ICB group  
12 than in the non-ICB group, whereas the FC between the right NAcc and left MOG was higher  
13 in the ICB group. Several neuroimaging studies have revealed that the activity of the NAcc  
14 was increased in patients with ICB (Santangelo et al., 2019). One study reported that  
15 fluorodopa uptake in patients with ICB increased in the medial regions of the prefrontal  
16 cortex (Joutsa et al., 2012). These results, including ours, suggest that both the NAcc and  
17 vmPFC are functionally altered in patients with ICB, which is consistent with our finding that  
18 the FC between these two regions decreased. Moreover, the vmPFC is structurally and  
19 functionally linked to the NAcc through the direct projections of glutamate neurons (Rusche



1 et al., 2021; Wichmann and Delong, 2006). Previous neuroimaging studies have shown that  
2 while the NAcc has a broad function in reward-based learning, the vmPFC plays a specific  
3 role in evaluating reward value (Haber and Knutson, 2010; Liu et al., 2011). Furthermore,  
4 several studies have reported that the vmPFC is crucial for risky decision-making (Clark,  
5 2010; Rogalsky et al., 2012). Therefore, a decrease in the FC between these regions might  
6 disrupt reward-based learning, which in turn induces ICB.

7 In contrast, another study reported the disruption of visuospatial memory in patients  
8 with ICB (Vitale et al., 2011). Our results also reflect this disruption by showing an increase  
9 in FC between the right NAcc and left MOG since the MOG plays a critical role in visual  
10 processing (Wang et al., 2015). We acknowledge that the NAcc and MOG are not directly  
11 connected, but indirectly connected via thalamus (Takeshige-Amano et al., 2022), and this  
12 increase of FC might reflect the disruption of other cognitive functions such as visual  
13 emotion recognition (Takeshige-Amano et al., 2022). Thus, we can only speculate on the  
14 functional role of the increase in FC between these two regions in the occurrence of ICB in  
15 patients with PD. Further neuropsychological studies are required to clarify this role.

16 No significant difference in the FC between the putamen and caudate was found. The  
17 reason for this specificity might be that the NAcc in patients with ICB was relatively intact  
18 compared with other subregions of the striatum. The load of alpha-synuclein in the NAcc was  
19 lower in patients with ICB than in those without ICB, whereas that in the putamen or caudate

1 was not significantly different (Barbosa et al., 2019). Furthermore, the ventral striatum was  
2 relatively intact compared with other regions of the striatum until the late stage of PD (Cools,  
3 2006). Taken together, the NAcc may contribute more to the occurrence of ICB than the  
4 putamen or caudate.

5 We found a significant difference in the FC of the right NAcc but not in that of the  
6 left NAcc. The right NAcc might be more important in controlling reward-based learning  
7 than the left NAcc as several studies have shown that action inhibition is right-dominant  
8 (Aron et al., 2004; Garavan et al., 1999; Rubia et al., 2003). Another reason for this laterality  
9 may be the rather high rate of right dominance of motor symptoms in the ICB group,  
10 although the rate of the dominant side of motor symptoms was not significantly different  
11 between the ICB and non-ICB groups. In fact, the right-sided onset of motor symptoms has  
12 recently been proposed to be another risk factor for ICB (Phillipps et al., 2020). The right  
13 dominance of motor symptoms means that the right striatum is intact compared with the left  
14 striatum, which might cause an overdose of dopamine in the right striatum. Therefore, the  
15 right NAcc is the major component that induces ICB in patients with PD.

16 In contrast, two studies reported significant alterations in the FC of the caudate and  
17 putamen in patients with ICB (Carriere et al., 2015; Ruitenberg et al., 2018), while other  
18 studies have suggested the involvement of the dorsal striatum in reward-based learning  
19 (Haber and Knutson, 2010). These differences might be due to the different definitions of

1 seeds or distributions of subcategories in the ICB (e.g., The rate of hypersexuality in studies  
2 by Carrire et al. (2015) and Ruitenberg et al. (2018) was 70% and 43%, respectively, while  
3 the rate in our study was 8.1%). Therefore, different cortico-striatal networks may be  
4 associated with different ICB subcategories. Future studies are required to clarify the neural  
5 correlates of each ICB subcategory.

6

#### 7 *4.2 FC of striatum was different in patients with ICD and those with DDS*

8 We observed a decrease in FC between the left NAcc and right PCC in patients with  
9 DDS compared with those with ICD. The PCC and NAcc play critical roles in reward-based  
10 learning (Liu et al., 2011). The decrease in FC in these regions reflects that the  
11 reward-processing steps are differentially altered in patients with ICD and DDS. Another  
12 reason for the decrease in FC between the right PCC and left NAcc in patients with DDS may  
13 be the difference in the sensitivity to levodopa between patients with ICD and those with  
14 DDS. Several case reports have indicated that levodopa preferentially induces DDS (Evans et  
15 al., 2009). One study also reported that levodopa decreased the FC between the ventral  
16 striatum and PCC (Kelly et al., 2009). Therefore, patients with DDS might be more sensitive  
17 to levodopa than those with ICD.

18 We also found an increase in FC between the right putamen and left STG and  
19 between the left caudate and bilateral MOG in patients with DDS. The left STG is crucial for

1 semantic processing (Price, 2012), whereas MOG is important for visual processing (Wang et  
2 al., 2015). Taken together, the involvement of the striatum in semantic or visual processing  
3 may differ between patients with ICD and DDS. Therefore, the functional relationship  
4 between the striatum and regions related to reward, semantic, or visual processing might be  
5 differentially altered in patients with ICD compared with those with DDS. These altered  
6 neural circuits may explain ICB heterogeneity.

7

#### 8 *4.3 No significant difference in the GMV*

9         While we found significant differences in the FC of the striatum according to ICB  
10 features, we detected no significant differences in the GMV. Four out of ten previous studies  
11 comparing patients with and without ICB showed non-significant differences in GMV  
12 between the ICB and non-ICB groups (Santangelo et al., 2019). ICB are reversible symptoms,  
13 since these behaviors can be ameliorated by reducing the dose of DA (Evans et al., 2009).  
14 This implies that reversible functional alterations can induce ICB, and our results suggest that  
15 functional differences can occur in patients with ICB, even without structural differences.  
16 Taken together, functional measurements are more useful than structural measurements for  
17 detecting ICB, ICD, and DDS.

18

#### 19 *4.4 Limitations*

1           This study has several limitations. First, we defined ICB using only the J-QUIP. The  
2 accuracy of J-QUIP in detecting ICB was comparable to that of an internationally established  
3 questionnaire for detecting ICB (Tanaka et al., 2013). Nevertheless, these scores are  
4 subjective and may underestimate the status of ICB (Perez-Lloret et al., 2012). Future studies  
5 are required to evaluate the status of ICB using objective neuropsychological tests such as the  
6 Iowa Gambling Task (Buelow and Suhr, 2009).

7           Second, this was a retrospective study; therefore, it is not clear whether alterations in  
8 FC were induced by DRT or whether they already existed before DRT. Future prospective  
9 and longitudinal studies are required to reveal the causality of changes in FC in these  
10 significantly different clusters.

11           Third, the number of patients within some ICB subcategories, such as pathological  
12 gambling or hypersexuality, was relatively small. Therefore, we could not differentiate the  
13 neural correlates of each ICB subcategory. Future multi-center studies are required to  
14 increase the sample size of patients with ICB and to detect the unique neural characteristics  
15 of each ICB subcategory.

16

17

18 *4.5 Conclusions*

1           Our findings showed that cortico-striatal networks play an important role in the  
2           occurrence of ICB and that these networks reflect the different characteristics of ICD and  
3           DDS. Evaluating the FC of these networks might be useful for detecting ICB, which may be  
4           underestimated through clinical interviews alone. Elucidating the altered regions is important  
5           not only for identifying biomarkers for ICB but also for clarifying the treatment target of ICB  
6           with neuromodulation.  
7

1 **Disclosure of competing interests**

2 The authors declare no competing interests.

3

4 **Acknowledgements**

5 This study was supported by Grants-in-Aid from the Research Committee of Central Nervous

6 System Degenerative Diseases, Research on Policy Planning and Evaluation for Rare and

7 Intractable Diseases, Health, Labor and Welfare Sciences Research Grants, the Ministry of

8 Health, Labor and Welfare, Japan (Grant number: 20FC104).

9

10 **CRedit author statement**

11 IK: Conceptualization, Methodology, Software, Data Curation, Formal analysis, Writing -

12 Original Draft, Visualization

13 GR: Writing - Review & Editing

14 KO: Investigation, Resources, Project Administration

15 KA: Writing - Review & Editing

16 YK: Investigation, Resources, Project Administration, Writing - Review & Editing

17 HM: Supervision, Writing - Review & Editing, Funding Acquisition

18

1 **References**

- 2 Aron, A.R., Robbins, T.W., Poldrack, R.A., 2004. Inhibition and the right inferior frontal  
3 cortex. *Trends Cogn. Sci.* 8, 170–177.
- 4 Barbosa, P., Hapuarachchi, B., Djamshidian, A., Strand, K., Lees, A.J., de Silva, R., Holton,  
5 J.L., Warner, T.T., 2019. Lower nucleus accumbens  $\alpha$ -synuclein load and D3 receptor  
6 levels in Parkinson’s disease with impulsive compulsive behaviours. *Brain* 142,  
7 3580–3591.
- 8 Buelow, M.T., Suhr, J.A., 2009. Construct validity of the Iowa Gambling Task.  
9 *Neuropsychol. Rev.* 19, 102–114.
- 10 Carriere, N., Lopes, R., Defebvre, L., Delmaire, C., Dujardin, K., 2015. Impaired  
11 corticostriatal connectivity in impulse control disorders in Parkinson disease.  
12 *Neurology* 84, 2116–2123.
- 13 Ceravolo, R., Frosini, D., Rossi, C., Bonuccelli, U., 2010. Spectrum of addictions in  
14 Parkinson’s disease: from dopamine dysregulation syndrome to impulse control  
15 disorders. *J. Neurol.* 257, S276-83.
- 16 Clark, L., 2010. Decision-making during gambling: an integration of cognitive and  
17 psychobiological approaches. *Philos. Trans. R. Soc. Lond. B Biol. Sci.* 365, 319–330.
- 18 Cools, R., 2006. Dopaminergic modulation of cognitive function-implications for L-DOPA  
19 treatment in Parkinson’s disease. *Neurosci. Biobehav. Rev.* 30, 1–23.



- 1 Desikan, R.S., Ségonne, F., Fischl, B., Quinn, B.T., Dickerson, B.C., Blacker, D., Buckner,  
2 R.L., Dale, A.M., Maguire, R.P., Hyman, B.T., Albert, M.S., Killiany, R.J., 2006. An  
3 automated labeling system for subdividing the human cerebral cortex on MRI scans  
4 into gyral based regions of interest. *Neuroimage* 31, 968–980.
- 5 Esteban, O., Markiewicz, C.J., Blair, R.W., Moodie, C.A., Isik, A.I., Erramuzpe, A., Kent,  
6 J.D., Goncalves, M., DuPre, E., Snyder, M., Oya, H., Ghosh, S.S., Wright, J., Durnez,  
7 J., Poldrack, R.A., Gorgolewski, K.J., 2019. fMRIPrep: a robust preprocessing  
8 pipeline for functional MRI. *Nat. Methods* 16, 111–116.
- 9 Evans, A.H., Strafella, A.P., Weintraub, D., Stacy, M., 2009. Impulsive and compulsive  
10 behaviors in Parkinson’s disease. *Mov. Disord.* 24, 1561–1570.
- 11 Friston, K.J., 2003. Statistical Parametric Mapping, in: Kötter, R. (Ed.), *Neuroscience*  
12 *Databases: A Practical Guide*. Springer US, Boston, MA, pp. 237–250.
- 13 Garavan, H., Ross, T.J., Stein, E.A., 1999. Right hemispheric dominance of inhibitory  
14 control: an event-related functional MRI study. *Proc. Natl. Acad. Sci. U. S. A.* 96,  
15 8301–8306.
- 16 Haber, S.N., Knutson, B., 2010. The reward circuit: linking primate anatomy and human  
17 imaging. *Neuropsychopharmacology* 35, 4–26.

- 1 Joutsa, J., Martikainen, K., Niemelä, S., Johansson, J., Forsback, S., Rinne, J.O., Kaasinen, V.,  
2 2012. Increased medial orbitofrontal [18F]fluorodopa uptake in Parkinsonian impulse  
3 control disorders. *Mov. Disord.* 27, 778–782.
- 4 Kajiyama, Y., Hattori, N., Nakano, T., Revankar, G.S., Otomune, H., Hashimoto, R., Mori, E.,  
5 Ikeda, M., Mihara, M., Mochizuki, H., 2021. Decreased frontotemporal connectivity  
6 in patients with parkinson’s disease experiencing face pareidolia. *NPJ Parkinsons Dis*  
7 7, 90.
- 8 Kanai, R., Rees, G., 2011. The structural basis of inter-individual differences in human  
9 behaviour and cognition. *Nat. Rev. Neurosci.* 12, 231–242.
- 10 Kelly, C., de Zubicaray, G., Di Martino, A., Copland, D.A., Reiss, P.T., Klein, D.F.,  
11 Castellanos, F.X., Milham, M.P., McMahon, K., 2009. L-dopa modulates functional  
12 connectivity in striatal cognitive and motor networks: a double-blind  
13 placebo-controlled study. *J. Neurosci.* 29, 7364–7378.
- 14 Kim, H.-Y., 2017. Statistical notes for clinical researchers: Chi-squared test and Fisher’s  
15 exact test. *Restor. Dent. Endod.* 42, 152–155.
- 16 Koike, S., Tanaka, S.C., Okada, T., Aso, T., Yamashita, A., Yamashita, O., Asano, M.,  
17 Maikusa, N., Morita, K., Okada, N., Fukunaga, M., Uematsu, A., Togo, H., Miyazaki,  
18 A., Murata, K., Urushibata, Y., Autio, J., Ose, T., Yoshimoto, J., Araki, T., Glasser,  
19 M.F., Van Essen, D.C., Maruyama, M., Sadato, N., Kawato, M., Kasai, K., Okamoto,

- 1 Y., Hanakawa, T., Hayashi, T., 2021. Brain/MINDS beyond human brain MRI  
2 project: A protocol for multi-level harmonization across brain disorders throughout  
3 the lifespan. *NeuroImage: Clinical* 30, 102600.
- 4 Liu, X., Hairston, J., Schrier, M., Fan, J., 2011. Common and distinct networks underlying  
5 reward valence and processing stages: a meta-analysis of functional neuroimaging  
6 studies. *Neurosci. Biobehav. Rev.* 35, 1219–1236.
- 7 Marek, S., Tervo-Clemmens, B., Calabro, F.J., Montez, D.F., Kay, B.P., Hatoum, A.S.,  
8 Donohue, M.R., Foran, W., Miller, R.L., Hendrickson, T.J., Malone, S.M., Kandala,  
9 S., Feczko, E., Miranda-Dominguez, O., Graham, A.M., Earl, E.A., Perrone, A.J.,  
10 Cordova, M., Doyle, O., Moore, L.A., Conan, G.M., Uriarte, J., Snider, K., Lynch,  
11 B.J., Wilgenbusch, J.C., Pengo, T., Tam, A., Chen, J., Newbold, D.J., Zheng, A.,  
12 Seider, N.A., Van, A.N., Metoki, A., Chauvin, R.J., Laumann, T.O., Greene, D.J.,  
13 Petersen, S.E., Garavan, H., Thompson, W.K., Nichols, T.E., Yeo, B.T.T., Barch,  
14 D.M., Luna, B., Fair, D.A., Dosenbach, N.U.F., 2022. Reproducible brain-wide  
15 association studies require thousands of individuals. *Nature* 603, 654–660.
- 16 Mata-Marín, D., Pineda-Pardo, J.A., Molina, J.A., Vela, L., Alonso-Frech, F., Obeso, I., 2021.  
17 Aberrant Salient and Corticolimbic Connectivity in Hypersexual Parkinson’s Disease.  
18 *Brain Connectivity*. <https://doi.org/10.1089/brain.2020.0868>

- 1 Nakano, T., Kajiyama, Y., Revankar, G.S., Hashimoto, R., Watanabe, Y., Kishima, H., Ikeda,  
2 M., Mihara, M., Mochizuki, H., Hattori, N., 2021. Neural networks associated with  
3 quality of life in patients with Parkinson’s disease. *Parkinsonism Relat. Disord.* 89,  
4 6–12.
- 5 Navalpotro-Gomez, I., Kim, J., Paz-Alonso, P.M., Delgado-Alvarado, M., Quiroga-Varela,  
6 A., Jimenez-Urbieto, H., Carreiras, M., Strafella, A.P., Rodriguez-Oroz, M.C., 2020.  
7 Disrupted salience network dynamics in Parkinson’s disease patients with impulse  
8 control disorders. *Parkinsonism Relat. Disord.* 70, 74–81.
- 9 Otomune, H., Mihara, M., Hattori, N., Fujimoto, H., Kajiyama, Y., Konaka, K., Mitani, Y.,  
10 Watanabe, Y., Mochizuki, H., 2019. Involvement of cortical dysfunction in frequent  
11 falls in patients with Parkinson’s disease. *Parkinsonism Relat. Disord.* 64, 169–174.
- 12 Parkes, L., Fulcher, B., Yücel, M., Fornito, A., 2018. An evaluation of the efficacy, reliability,  
13 and sensitivity of motion correction strategies for resting-state functional MRI.  
14 *Neuroimage* 171, 415–436.
- 15 Perez-Lloret, S., Rey, M.V., Fabre, N., Ory, F., Spampinato, U., Montastruc, J.-L., Rascol, O.,  
16 2012. Do Parkinson’s disease patients disclose their adverse events spontaneously?  
17 *Eur. J. Clin. Pharmacol.* 68, 857–865.
- 18 Phillipps, C., Longato, N., Béreau, M., Carrière, N., Lagha-Boukbiza, O., Mengin, A.C.,  
19 Monga, B., Defebvre, L., Ory-Magne, F., Castrioto, A., Lhommée, E., Rascol, O.,

- 1            Krack, P., Tranchant, C., Corvol, J.-C., Anheim, M., 2020. Is Motor Side Onset of  
2            Parkinson’s Disease a Risk Factor for Developing Impulsive-Compulsive Behavior?  
3            A Cross-Sectional Study. *Mov. Disord.* 35, 1080–1081.
- 4            Postuma, R.B., Berg, D., Stern, M., Poewe, W., Olanow, C.W., Oertel, W., Obeso, J., Marek,  
5            K., Litvan, I., Lang, A.E., Halliday, G., Goetz, C.G., Gasser, T., Dubois, B., Chan, P.,  
6            Bloem, B.R., Adler, C.H., Deuschl, G., 2015. MDS clinical diagnostic criteria for  
7            Parkinson’s disease. *Mov. Disord.* 30, 1591–1601.
- 8            Power, J.D., Mitra, A., Laumann, T.O., Snyder, A.Z., Schlaggar, B.L., Petersen, S.E., 2014.  
9            Methods to detect, characterize, and remove motion artifact in resting state fMRI.  
10            *Neuroimage* 84, 320–341.
- 11           Price, C.J., 2012. A review and synthesis of the first 20 years of PET and fMRI studies of  
12           heard speech, spoken language and reading. *Neuroimage* 62, 816–847.
- 13           Rocha, E.M., De Miranda, B., Sanders, L.H., 2018. Alpha-synuclein: Pathology,  
14           mitochondrial dysfunction and neuroinflammation in Parkinson’s disease. *Neurobiol.*  
15           *Dis.* 109, 249–257.
- 16           Rogalsky, C., Vidal, C., Li, X., Damasio, H., 2012. Risky decision-making in older adults  
17           without cognitive deficits: an fMRI study of VMPFC using the Iowa Gambling Task.  
18           *Soc. Neurosci.* 7, 178–190.

- 1 Rubia, K., Smith, A.B., Brammer, M.J., Taylor, E., 2003. Right inferior prefrontal cortex  
2 mediates response inhibition while mesial prefrontal cortex is responsible for error  
3 detection. *Neuroimage* 20, 351–358.
- 4 Ruitenbergh, M.F.L., Wu, T., Averbeck, B.B., Chou, K.L., Koppelmans, V., Seidler, R.D.,  
5 2018. Impulsivity in Parkinson’s Disease Is Associated With Alterations in Affective  
6 and Sensorimotor Striatal Networks. *Front. Neurol.* 9, 279.
- 7 Rusche, T., Kaufmann, J., Voges, J., 2021. Nucleus accumbens projections: Validity and  
8 reliability of fiber reconstructions based on high-resolution diffusion-weighted MRI.  
9 *Hum. Brain Mapp.* 42, 5888–5910.
- 10 Santangelo, G., Raimo, S., Cropano, M., Vitale, C., Barone, P., Trojano, L., 2019. Neural  
11 bases of impulse control disorders in Parkinson’s disease: A systematic review and an  
12 ALE meta-analysis. *Neurosci. Biobehav. Rev.* 107, 672–685.
- 13 Takeshige-Amano, H., Hatano, T., Kamagata, K., Andica, C., Uchida, W., Abe, M., Ogawa,  
14 T., Shimo, Y., Oyama, G., Umemura, A., Ito, M., Hori, M., Aoki, S., Hattori, N.,  
15 2022. White matter microstructures in Parkinson’s disease with and without impulse  
16 control behaviors. *Ann. Clin. Transl. Neurol.* 9, 253–263.
- 17 Tanaka, K., Wada-Isoe, K., Nakashita, S., Yamamoto, M., Nakashima, K., 2013. Impulsive  
18 compulsive behaviors in Japanese Parkinson’s disease patients and utility of the

- 1 Japanese version of the Questionnaire for Impulsive-Compulsive Disorders in  
2 Parkinson's disease. *J. Neurol. Sci.* 331, 76–80.
- 3 Tessitore, A., Santangelo, G., De Micco, R., Giordano, A., Raimo, S., Amboni, M., Esposito,  
4 F., Barone, P., Tedeschi, G., Vitale, C., 2017. Resting-state brain networks in patients  
5 with Parkinson's disease and impulse control disorders. *Cortex* 94, 63–72.
- 6 Tomlinson, C.L., Stowe, R., Patel, S., Rick, C., Gray, R., Clarke, C.E., 2010. Systematic  
7 review of levodopa dose equivalency reporting in Parkinson's disease. *Mov. Disord.*  
8 25, 2649–2653.
- 9 Vitale, C., Santangelo, G., Trojano, L., Verde, F., Rocco, M., Grossi, D., Barone, P., 2011.  
10 Comparative neuropsychological profile of pathological gambling, hypersexuality,  
11 and compulsive eating in Parkinson's disease. *Mov. Disord.* 26, 830–836.
- 12 Vriend, C., 2018. The neurobiology of impulse control disorders in Parkinson's disease: from  
13 neurotransmitters to neural networks. *Cell Tissue Res.* 373, 327–336.
- 14 Wang, L., Mruczek, R.E.B., Arcaro, M.J., Kastner, S., 2015. Probabilistic maps of visual  
15 topography in human cortex. *Cereb. Cortex* 25, 3911–3931.
- 16 Weintraub, D., Claassen, D.O., 2017. Impulse Control and Related Disorders in Parkinson's  
17 Disease. *Int. Rev. Neurobiol.* 133, 679–717.
- 18 Wichmann, T., DeLong, M.R., 2006. Deep brain stimulation for neurologic and  
19 neuropsychiatric disorders. *Neuron* 52, 197–204.

- 1 Zhang, G., Zhang, Z., Liu, L., Yang, J., Huang, J., Xiong, N., Wang, T., 2014. Impulsive and
- 2 compulsive behaviors in Parkinson's disease. *Front. Aging Neurosci.* 6, 318.
